# Supplementary material for: Coarsening of one-step deposited organolead triiodide perovskite films via Ostwald ripening for high efficiency planar-heterojunction solar cells
Source: Royal Society of Chemistry journal article supplement (doi:10.1039/c6dt00900j), 2016-01-01
Supplement: c6dt00900j1.pdf [file c6dt00900j1.pdf]

## Supplementary Information

### Coarsening of one-step deposited organolead triiodide perovskite films via Ostwald ripening for high efficiency planar-heterojunction solar cells

Weidong Zhu,<sup>a</sup> Chunxiong Bao,<sup>a</sup> Yangrunqian Wang,<sup>a</sup> Faming Li,<sup>a</sup> Xiaoxin Zhou,<sup>a</sup> Jie Yang,<sup>a</sup> Bihu Lv,<sup>b</sup> Xiaoyong Wang,<sup>b</sup> Tao Yu,<sup>\*abc</sup> and Zhigang Zou<sup>abc</sup>

<sup>a</sup>*National Laboratory of Solid State Microstructures & Eco-Materials and Renewable Energy Research Center (ERERC) at Department of Physics, Nanjing University, Nanjing 210093, P. R. China. E-mail: yutao@nju.edu.cn*

<sup>b</sup>*Collaborative Innovation Center of Advanced Microstructures, Nanjing University, Nanjing 210093, P. R. China.*

<sup>c</sup>*Jiangsu Key Laboratory for Nano Technology, Nanjing 210093, P. R. China.*

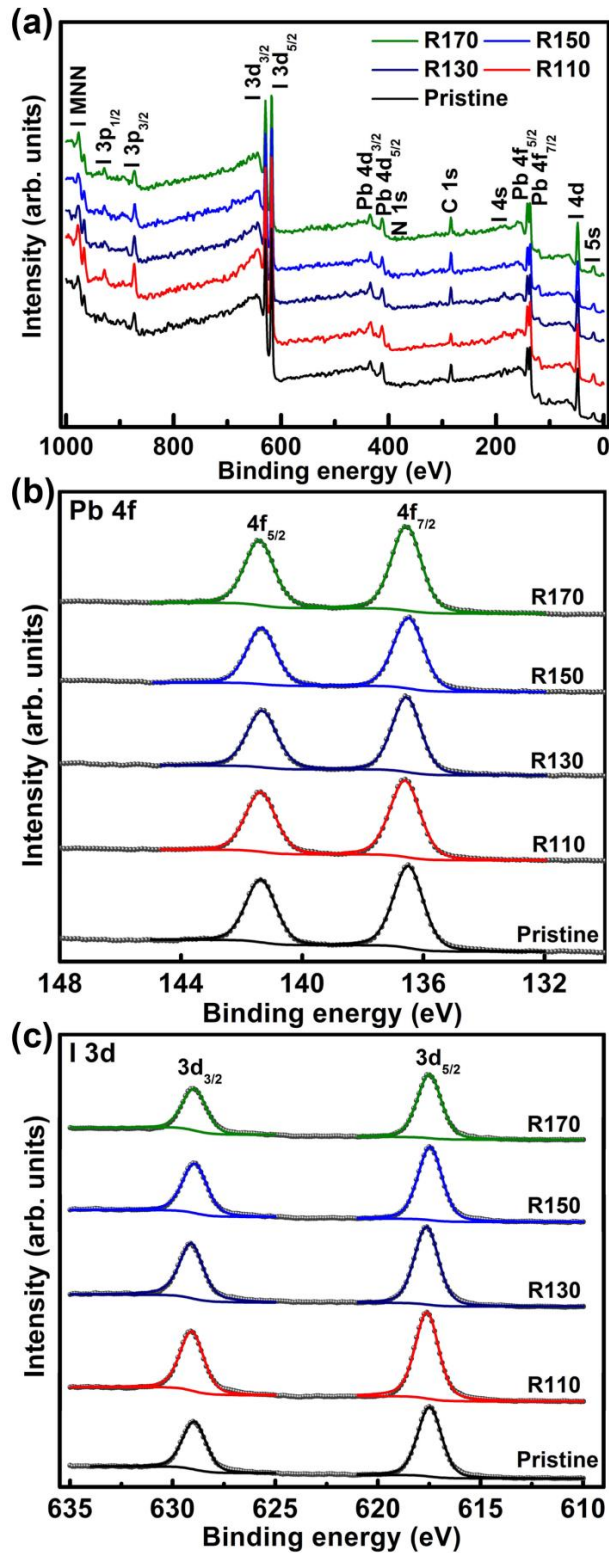

**Fig. S1** (a) The low resolution XPS survey spectra of pristine OTP film (Pristine) and coarsened OTP films with the post-synthesis heating treatment temperatures of 110 °C (R110), 130 °C (R130), 150 °C (R150), and 170 °C (R170), respectively. (b) and (c) are the corresponding Pb 4f and I 3d core level XPS spectra.

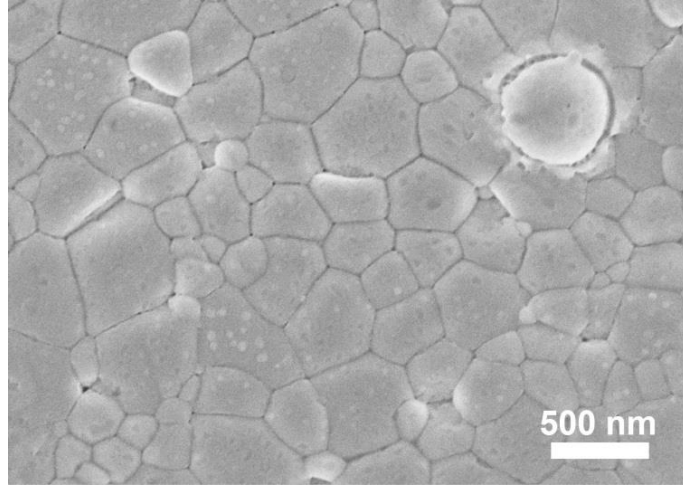

**Fig. S2** The top-view SEM image of the pristine OTP film after deposition of  $\text{CH}_3\text{NH}_3\text{I}$ .

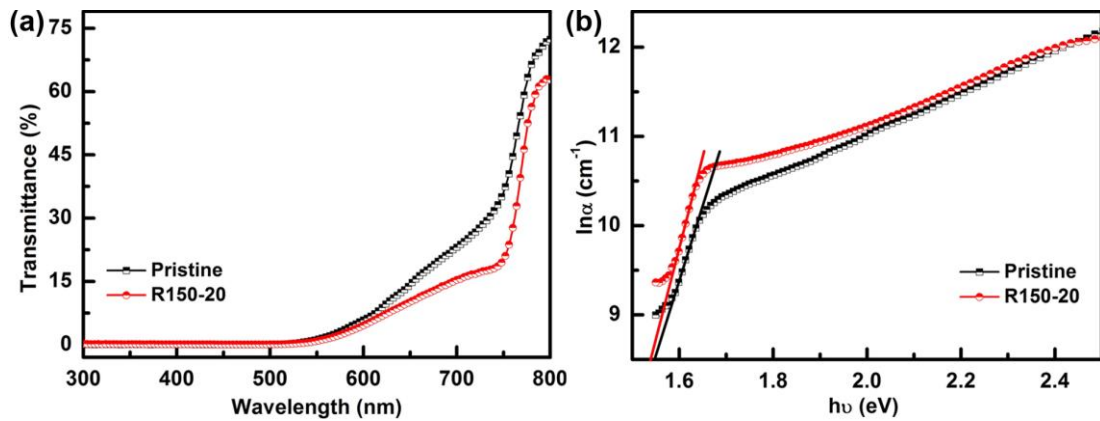

**Fig. S3** (a) Transmittance spectra of pristine OTP film (Pristine) and coarsened OTP film with the post-synthesis heating treatment temperature and time of 150 °C and 20 min (R150-20). (b) Determination of the Urbach energy ( $E_u$ ) of pristine OTP film and R150-20 sample using the

empirical equation:  $\ln \alpha = \frac{1}{E_u} h\nu + \ln \alpha_0 - \frac{E_g}{E_u}$ , where  $\alpha_0$  is constant,  $h\nu$  is the photon energy,

$E_g$  is the optical bandgap,  $E_u$  is the Urbach energy, and  $\alpha$  is the absorption coefficient.

The  $\alpha$  can be calculated from the Transmittance spectrum using the equation of  $\alpha = \frac{-\ln T}{d}$  ( $d$  is

the film thickness). By fitting the linear part of plots of  $\ln \alpha$  versus  $h\nu$ , the Urbach energy can be calculated from the slope of fitted straight line.

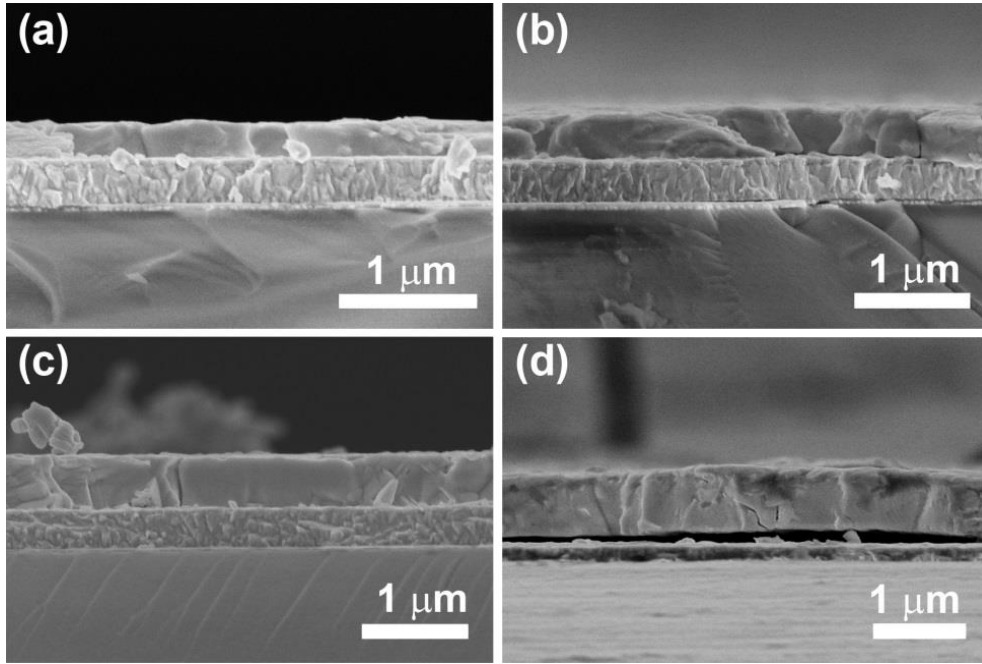

**Fig. S4** The cross-section SEM images of R150-20 samples with different thicknesses of 270, 440, 520, and 690 nm, respectively. The film thickness was changed by controlling the rotation speed during deposition of pristine OTP films.

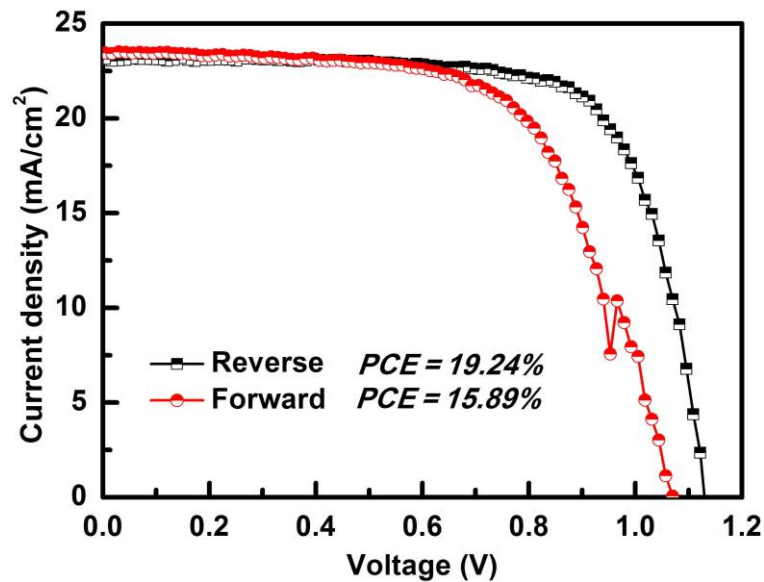

**Fig. S5** J-V curves measured at forward scan (Forward, from -0.1 V to 1.2 V) and reverse scan (Reverse, 1.2 V to -0.1 V) for the best performing perovskite solar cell employed the R150-20 sample with thickness of 440 nm. It should be noted that there was a kink at 0.95 V in forward J-V curve of cell, which has been frequently observed in the previous works and was difficult to be eliminated by the modification OTP film quality.<sup>1-3</sup> The underlying reason

for this phenomenon is mainly consisted in the migration of iodide ions/interstitials driven by an external electrical bias leading to shift in the effective work function at the respective electrodes of the cells.<sup>1</sup>

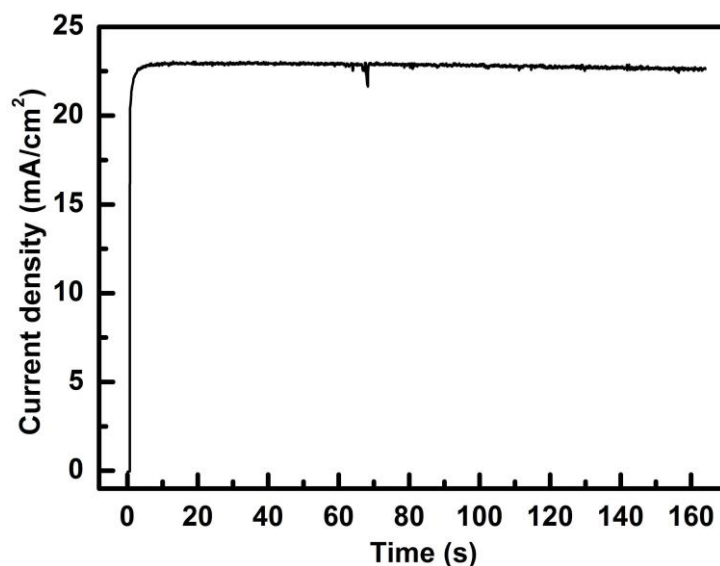

**Fig. S6** Photocurrent density as a function of time for best performing perovskite solar cell employed the R150-20 sample with thickness of 440 nm held at a forward bias of 0.01 V. The cell was placed in the dark prior to the start of the measurement.

**Table S1** PV parameters for the cells employed R150-20 samples with different thicknesses.

| Thickness (nm) | $J_{sc}$ (mA cm <sup>-2</sup> ) | $V_{oc}$ (V) | FF    | PCE (%) |
|----------------|---------------------------------|--------------|-------|---------|
| 270            | 22.15                           | 1.13         | 0.674 | 16.87   |
| 440            | 23.18                           | 1.12         | 0.710 | 18.43   |
| 520            | 23.80                           | 1.10         | 0.691 | 18.09   |
| 690            | 23.85                           | 1.09         | 0.648 | 16.85   |

## References

- [1] C. Li, S. Tscheuschner, F. Paulus, P. E. Hopkinson, J. Kießling, A. Köhler, Y. Vaynzof and S. Huettnner, *Adv. Mater.*, 2016, **28**, 2446-2454.
- [2] H. J. Snaith, A. Abate, J. M. Ball, G. E. Eperon, T. Leijtens, N. K. Noel, S. D. Stranks, J. T.-W. Wang, K. Wojciechowski and W. Zhang, *J. Phys. Chem. Lett.*, 2014, **5**, 1511-1515.

[3] R. S. Sanchez, V. Gonzalez-Pedro, J.-W. Lee, N.-G. Park, Y. S. Kang, I. Mora-Sero and J. Bisquert, *J. Phys. Chem. Lett.*, 2014, **5**, 2357-2363.
